# Supplementary material for: Knockdown of the translocon protein EXP2 in Plasmodium falciparum reduces growth and protein export
Source: PubMed Central journal article supplement (PMC6237293; doi:10.1371/journal.pone.0204785), 2018-11-15
Supplement: pone.0204785.s001.pdf [file pone.0204785.s001.pdf]

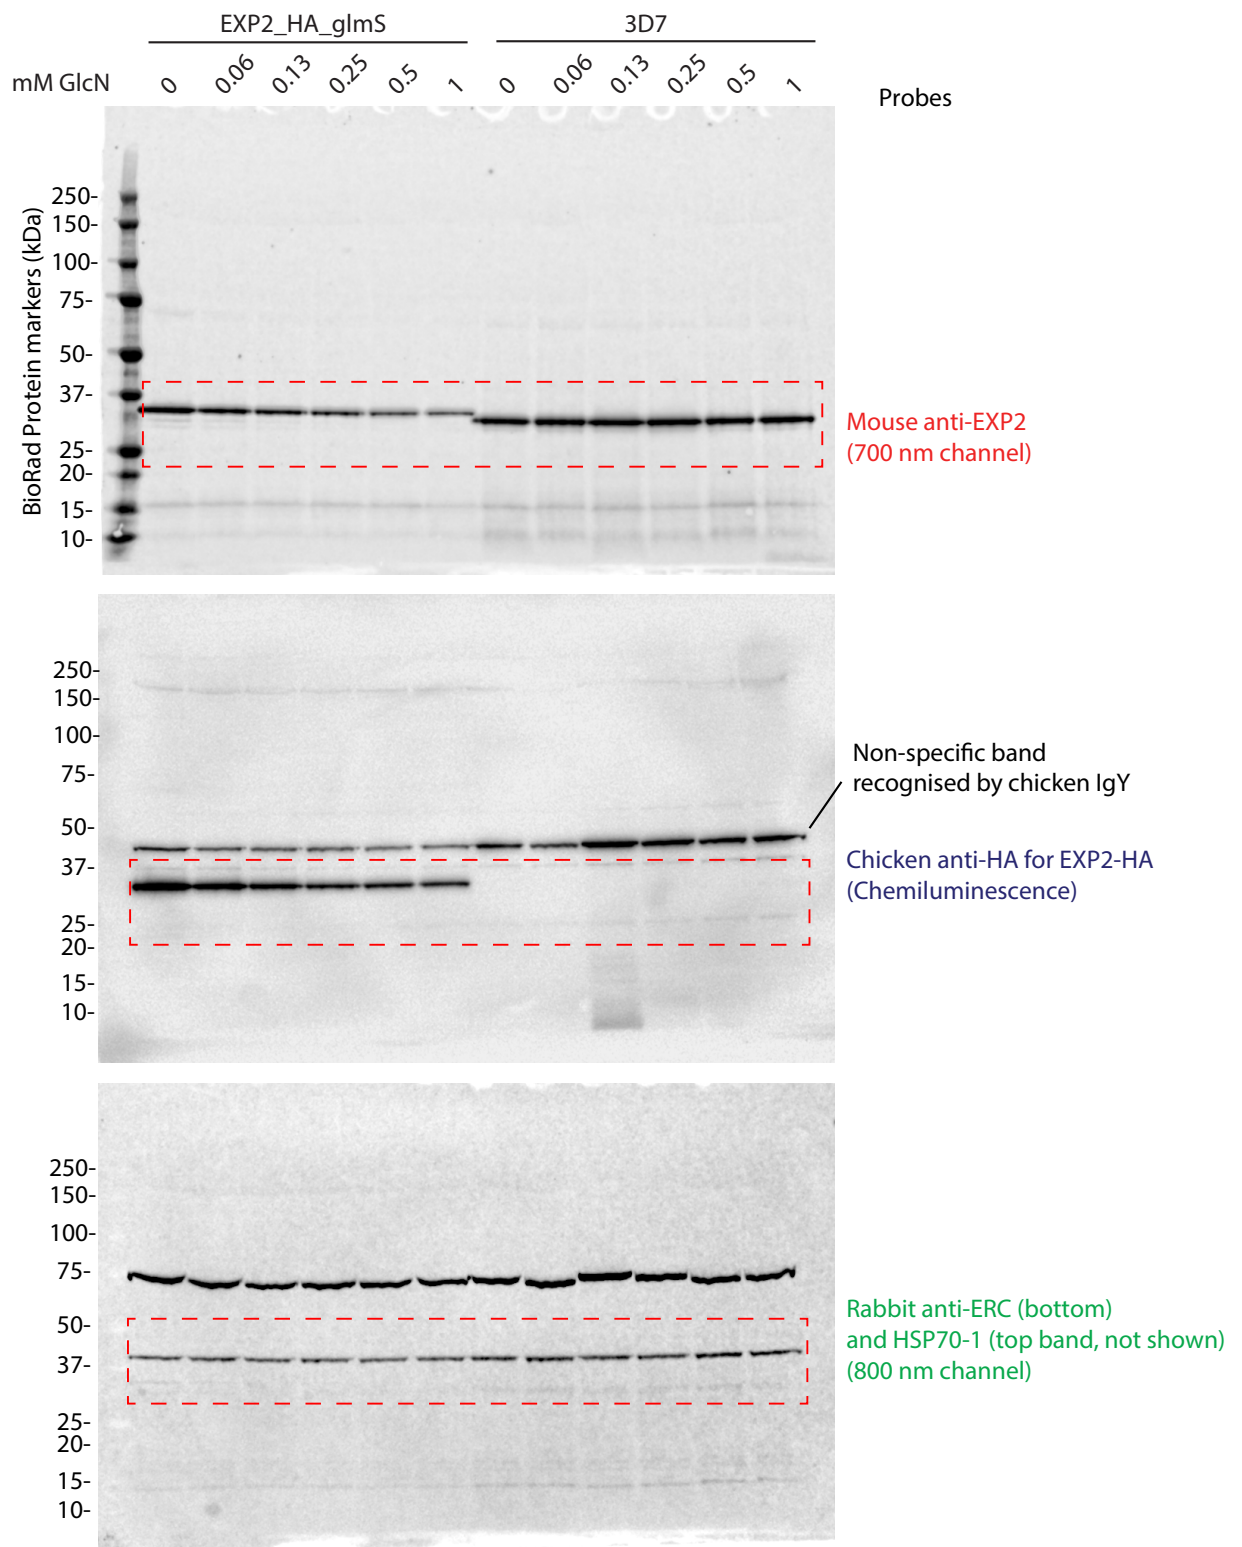

**S1 Fig. Original full size western blot images use to construct Fig.1C are shown along with the antibodies and fluorescent channels used to detect target proteins.** Note that that the same blot was probed and detected in different channels. The regions of the blots selected for construction of Fig 1C are indicated with a red dashed line.
