# Supplementary material for: Knockdown of the translocon protein EXP2 in Plasmodium falciparum reduces growth and protein export
Source: PubMed Central journal article supplement (PMC6237293; doi:10.1371/journal.pone.0204785), 2018-11-15
Supplement: pone.0204785.s002.pdf [file pone.0204785.s002.pdf]

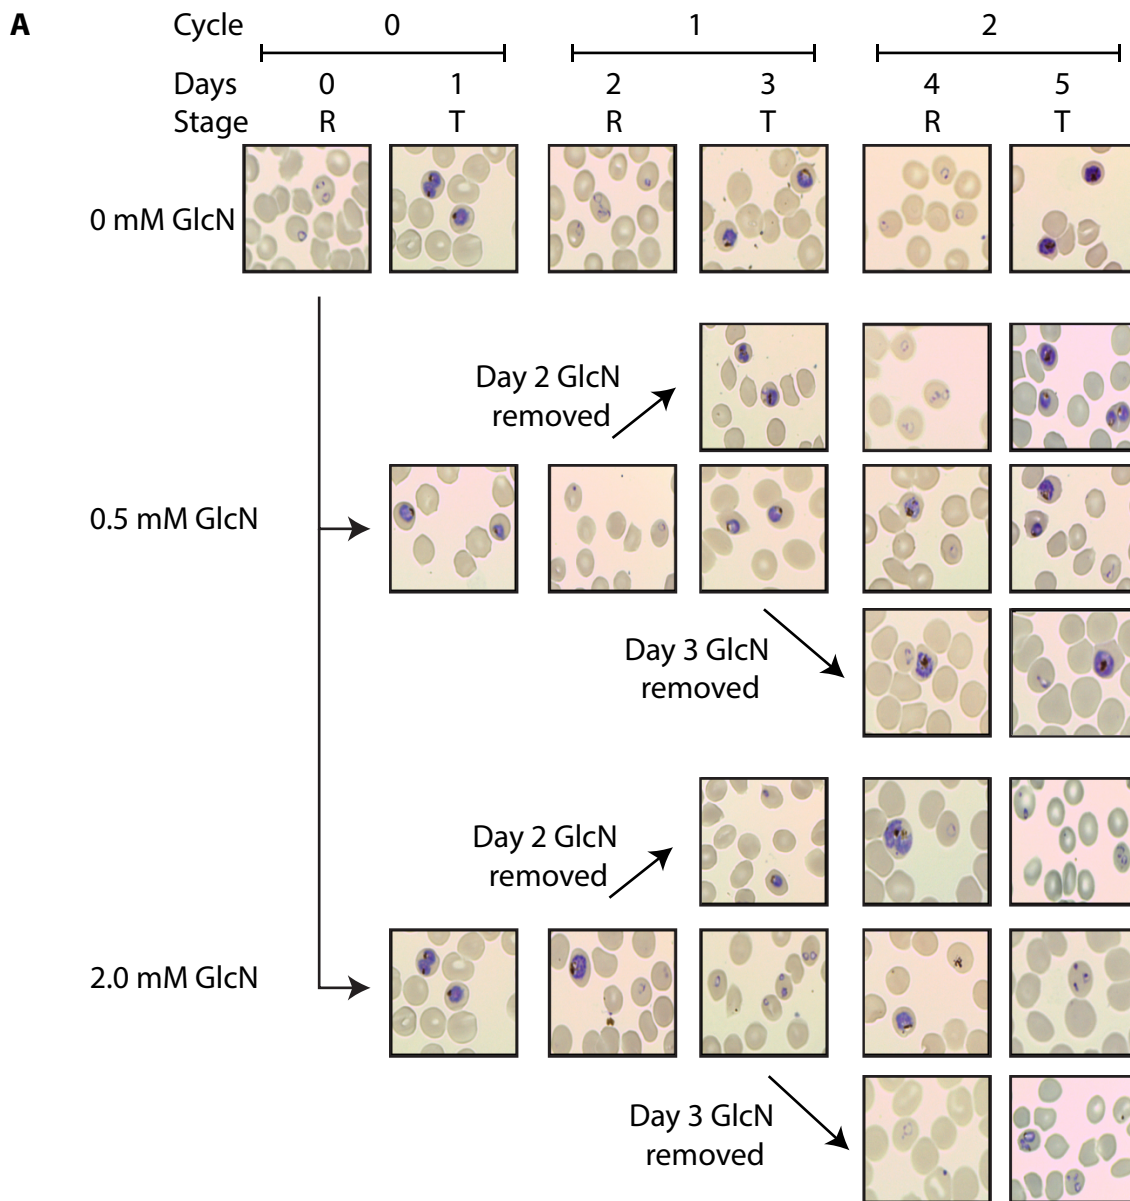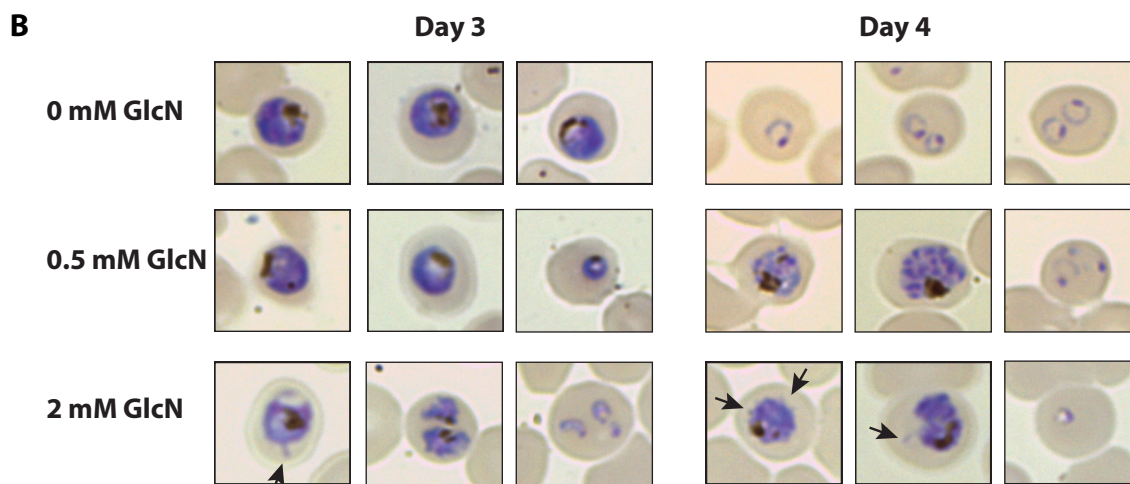

**S2 Fig. Knockdown of EXP2-HAGlmS inhibits parasite growth. A.** Giemsa stained thin blood smears showing growth slowed growth and parasite death caused by knockdown of EXP2-HAGlmS. Parasites smears are from experiment show in Fig 3. **B.** Magnified parasite images from Day 3 and 4 with arrows showing surface protrusions caused by knockdown of EXP2-HA.
